# Supplementary material for: Total synthesis of the thiopeptide amythiamicin DElectronic supplementary information (ESI) available: Spectroscopic data for synthetic 1. See http://www.rsc.org/suppdata/cc/b4/b401580k/
Source: Royal Society of Chemistry journal article supplement (doi:10.1039/b401580k), 2004-01-01
Supplement: b401580k.doc [file b401580k.doc]

**Amythiamicin D**

(Found: MH+, 1031.1693. C43H43N12O7S6 requires 1031.1696); = +138.0 (*c*=0.5 in MeOH); [lit.(ref 5) = +179.0 (*c*=0.5 in MeOH)]; 1H NMR (400 MHz; CDCl3) =8.97 (d, *J*=9.3, 1H; CHNH), 8.80 (d, *J*=7.8, 1H; CHNH), 8.38 (s, 1H; SCH), 8.38 (d, *J*=8.0, 1H; py-H), 8.36 (s, 1H; SCH), 8.24 (s, 1H; SCH), 8.13 (m, 2H; py-H and SCH), 7.82 (dd, *J*=9.4, 2.8, 1H; CH2NH), 7.25 (s, 1H; SCH), 6.82 (br. m, 1H; NHMe), 6.58 (d, *J*=5.8, 1H; CHNH)*, 5.42 (m, 1H; CH2CHNH), 5.25 (dd, *J*=7.8, 4.7, 1H; CHNH), 5.02 (dd, *J*=17.4, 9.9, 1H; CHHNH), 5.00 (app. t, *J*=6.1, 1H; CHNH), 4.03 (s, 3H; OMe), 3.91 (dd, *J*=17.3, 3.0, 1H; CHHNH), 2.74 (dd, *J*=13.5, 2.7, 1H; CHHCONHMe), 2.66 (s, 3H; Thia-Me), 2.66 (d, *J*=5.7, 3H; NHMe), 2.29 (m, 1H; CHMe2), 2.11 (m, 1H; CHMe2), 1.14 (d, *J*=6.6, 3H; CHMeMe), 1.07 (m, 1H; CHHCONHMe), 1.00 (d, *J*=6.9, 3H; CHMeMe), 0.95 (d, *J*=6.7, 3H; CHMeMe), 0.89 ppm (d, *J*=6.7, 3H; CHMeMe); 13C NMR (100 MHz; CDCl3) =172.8 (C), 169.6 (C), 169.2 (C), 169.1 (C), 168.6 (C), 167.6 (C), 164.9 (C), 162.0 (C), 161.9 (C), 161.4 (C), 161.2 (C), 160.0 (C), 154.4 (C), 150.5 (C), 150.3 (C), 150.2 (C), 148.8 (C), 148.3 (C), 148.2 (C), 142.1 (C), 140.6 (C), 140.3 (CH), 130.5 (CH), 127.7 (C), 125.2 (CH), 123.9 (CH), 123.2 (CH), 118.7 (CH), 114.3 (CH), 59.4 (CH), 56.2 (CH), 52.7 (Me), 48.3 (CH), 41.5 (CH2), 38.4 (CH2), 34.7 (CH), 33.4 (CH), 26.3 (Me), 19.2 (2 x Me), 18.3 (Me), 18.1 (Me), 12.3 ppm (Me); MS (ES): *m/z* (%): 1053 (32) [M+Na+], 1031 (18) [MH+], 459 (4), 380 (7), 345 (24), 258 (35), 250 (44), 245 (53), 219 (46), 184 (22) and 91 (100). * The position of the 29-NH signal is highly concentration dependent; H 7.04 ppm (*c* = 0.067 gcm3), H 6.74 ppm (*c* = 0.034 gcm3) and H 6.61 ppm (*c* = 0.022 gcm3).
